# Supplementary material
Source: PubMed Central journal article supplement (PMC8460178)
Supplement: mmc1.pdf [file mmc1.pdf]

# THE LANCET

## Rheumatology

### Supplementary appendix

This appendix formed part of the original submission and has been peer reviewed.  
We post it as supplied by the authors.

Supplement to: Maramattom BV, Philips G, Thomas J, et al. Inflammatory myositis after ChAdOx1 vaccination. *Lancet Rheumatol* 2021; published online Sept 23.  
[http://dx.doi.org/10.1016/S2665-9913\(21\)00312-X](http://dx.doi.org/10.1016/S2665-9913(21)00312-X).

**Table. 1. Clinical and laboratory features of our patients with post vaccinia inflammatory myositis.**

| Age (yrs), Sex | Time to onset after ChAdOx1-vaccination | Clinical signs and symptoms, Final Dx    | Laboratory parameters (peak)                                                                                                                                                                                                                                                                                                                                                                                                                                                                                                                           | Imaging                                                                                                                                                                                                                                                                                                                                                                  | Treatment                                             | Outcome and length of stay                           |
|----------------|-----------------------------------------|------------------------------------------|--------------------------------------------------------------------------------------------------------------------------------------------------------------------------------------------------------------------------------------------------------------------------------------------------------------------------------------------------------------------------------------------------------------------------------------------------------------------------------------------------------------------------------------------------------|--------------------------------------------------------------------------------------------------------------------------------------------------------------------------------------------------------------------------------------------------------------------------------------------------------------------------------------------------------------------------|-------------------------------------------------------|------------------------------------------------------|
| 1) 74/Male     | 2 days after first dose                 | Fever, tachycardia, arthralgia, myalgia, | SARS-CoV-2 RT PCR negative<br>Hb-7.6 gm ((12 – 15 gm/dl)<br>TC- 26 (4-11 K/uL)<br>ALC 1 (1-3 K/uL)<br>Platelets- 643 (150-450 K/uL)<br>ESR-123 mm/hr (< 15mm/ hr)<br>CRP-269 (< 5mg/L)<br>D-dimer-2010 (< 500 ng/ml)<br>Ferritin-1026 (20 - 250 ng/ml)<br>LDH-167 (135 – 214 U/L)<br>AST-180 (< 34 U/L)<br>ALT-170 (< 31 U/L)<br>CPK-24 (25 – 170 U/L)<br>ANCA- negative<br>ANA- negative<br>Myositis profile- negative<br>Blood/ Urine cultures –negative<br>ECHO- normal<br>Skin and muscle biopsy showed features of small-medium vessel vasculitis | CT chest; normal<br><br>18 FDG-PET CT; - Day 26- Mildly FDG avid multiple small vessels in intermuscular plane in bilateral thigh region and superficial femoral and deep popliteal vessels – ‘tree root pattern’<br><br>MRI; Day 30- Significant diffuse myositis of both lower limbs, gluteus and pelvic girdle and to a lesser extent in left upper limb.             | Oral Prednisolone 1 mg/ kg                            | Discharged in 10 days, in remission with steroids.   |
| 2) 75/Female   | 2 days after first dose                 | Fever, arthralgia, myalgia, tachycardia. | SARS-CoV-2 RT PCR negative<br>Hb- 10.4 (12 - 15) gm/dl)<br>TC- 14.8 ((4 – 11 K/uL)<br>ALC- 700 (1 – 3 K/uL)<br>ESR-120 (< 15mm/ hr)<br>CRP-271 (< 5mg/L)<br>D-dimer-2500 (< 500 ng/ml)<br>Ferritin-1236 (10 -120 ng/ml)<br>LDH-216 (135 – 214 U/L)<br>AST-250 (< 34 U/L)<br>ALT-194 (< 31 U/L)<br>CPK-30 ((25 – 170 U/L)<br>ANCA- negative<br>ANA- negative<br>Myositis profile- negative                                                                                                                                                              | CT chest; normal<br><br>18 FDG-PET CT- Day 25; Diffuse patchy minimally increased FDG avidity in skeletal muscles more evident in lower limb. Arteries show ‘tree root’ patterns.<br><br>MRI – Day 27-Multiple patchy areas of STIR hyperintensity involving the muscles of both thighs including all compartments, posterior compartment of both legs and pelvic girdle | Oral Prednisolone 1 mg/ kg +<br>Mycophenolate mofetil | Discharged in 8 days, in remission with medications. |

|               |                       |                             |                                                                                                                                                                                                                                                                                                                               |                                                                                     |                   |                                                   |
|---------------|-----------------------|-----------------------------|-------------------------------------------------------------------------------------------------------------------------------------------------------------------------------------------------------------------------------------------------------------------------------------------------------------------------------|-------------------------------------------------------------------------------------|-------------------|---------------------------------------------------|
|               |                       |                             | Blood/ Urine cultures –negative<br>ECHO- normal                                                                                                                                                                                                                                                                               |                                                                                     |                   |                                                   |
| 3) 80/ Female | 2 days after 2nd dose | Fever, fatigue, tachycardia | SARS-CoV-2 RT PCR negative<br>CPK-40 ((25 – 170 U/L)<br>Platelets-580 (150-450 K/uL)<br>D-dimer- 3160 (< 500 ng/ml)<br>ESR-59 (< 15mm/ hr)<br>CRP-102 (< 5mg/L)<br>Ferritin-411 (10 -120 ng/ml)<br>LDH-228 (135 – 214 U/L)<br>Albumin-3.3 (3.5-5.5 mg/dL)<br>Globulin –4.4 (A/G reversal)<br>Myositis profile/ ANCA- negative | MRI- Hyperintense signal in STIR MRI in most muscles of both upper and lower limbs. | Oral prednisolone | Discharged in 6 days, in remission with steroids. |

Abbreviations; TC- total WBC count, ALC- absolute lymphocyte count.
